# Supplementary material for: Nitro-Oleic Acid (NO2-OA) Improves Systolic Function in Dilated Cardiomyopathy by Attenuating Myocardial Fibrosis
Source: MDPI journal article supplement (doi:10.3390/ijms22169052), 2021-08-22
Supplement: s1 [file s1]

Nitro-oleic acid (NO<sub>2</sub>-OA) improves systolic function in dilated cardiomyopathy by attenuating myocardial fibrosis

**Supplemental Material**

Supplemental Figure S1

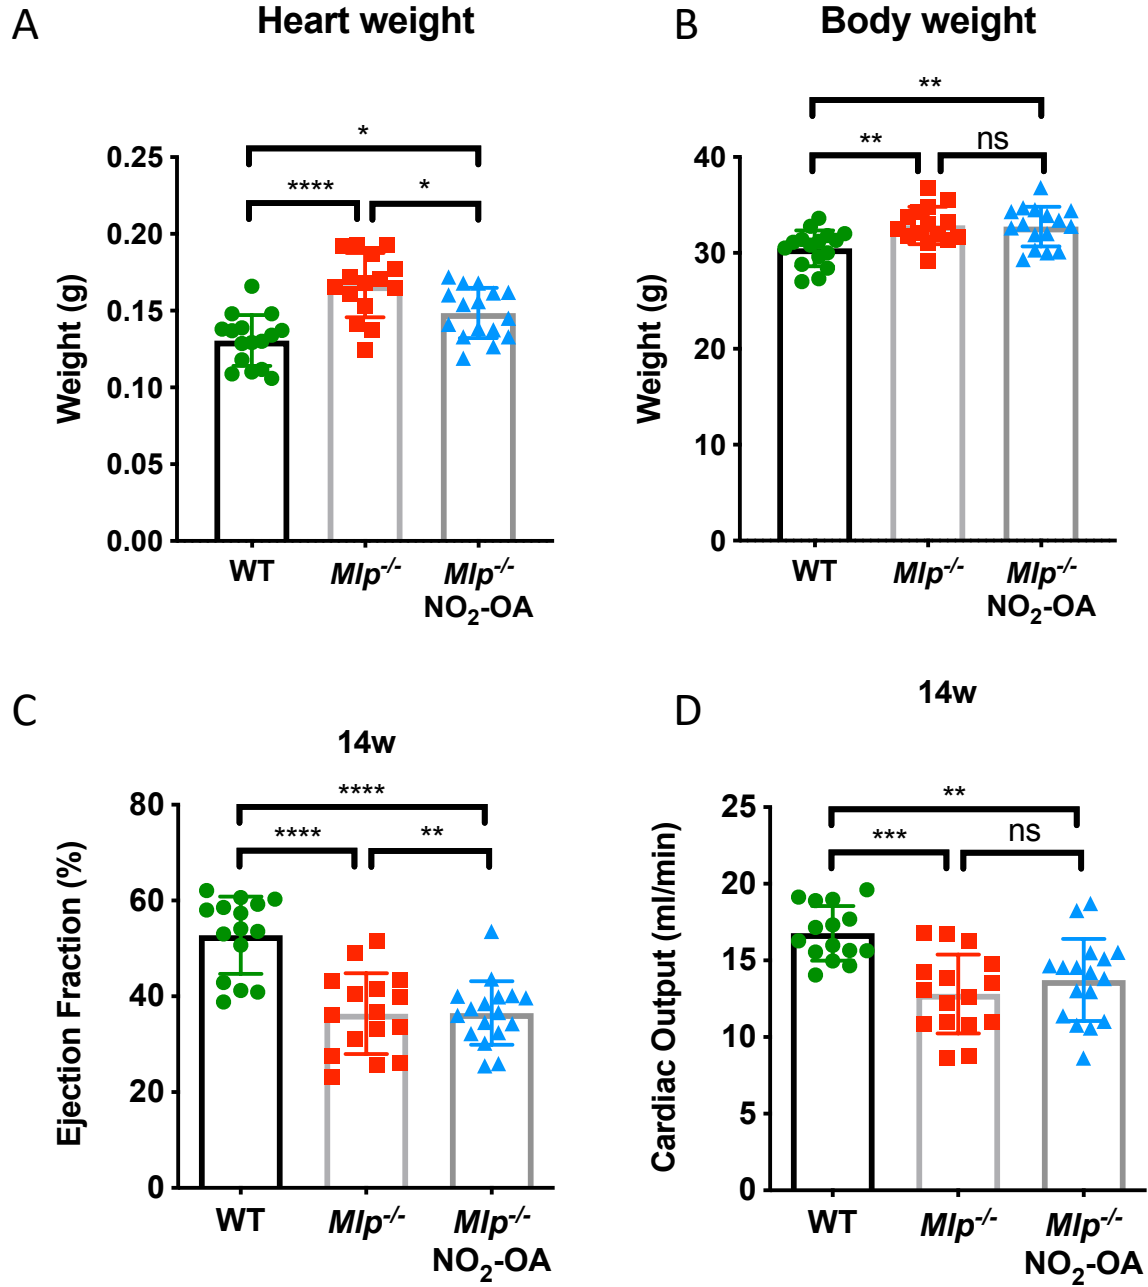

Supplemental Figure S2

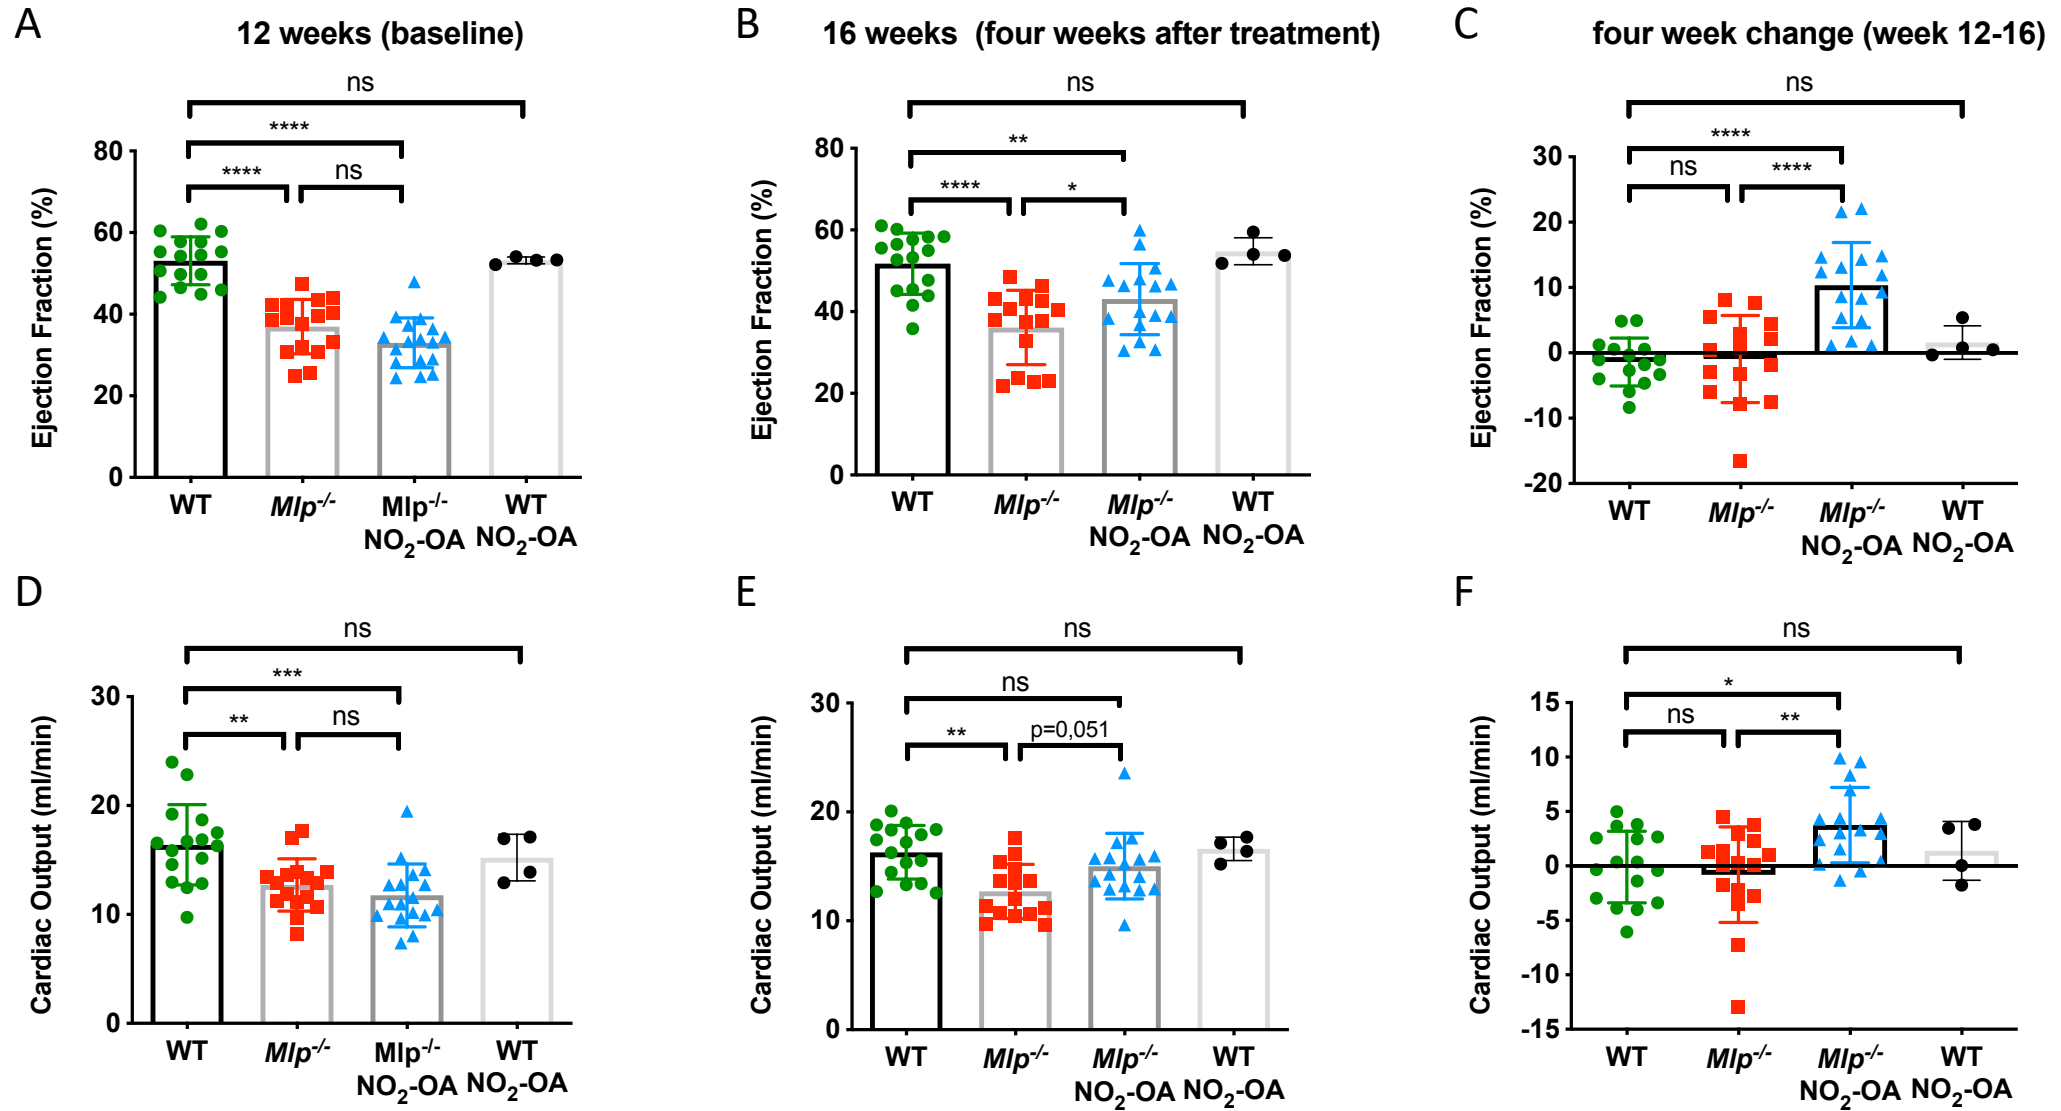

Supplemental Figure S3

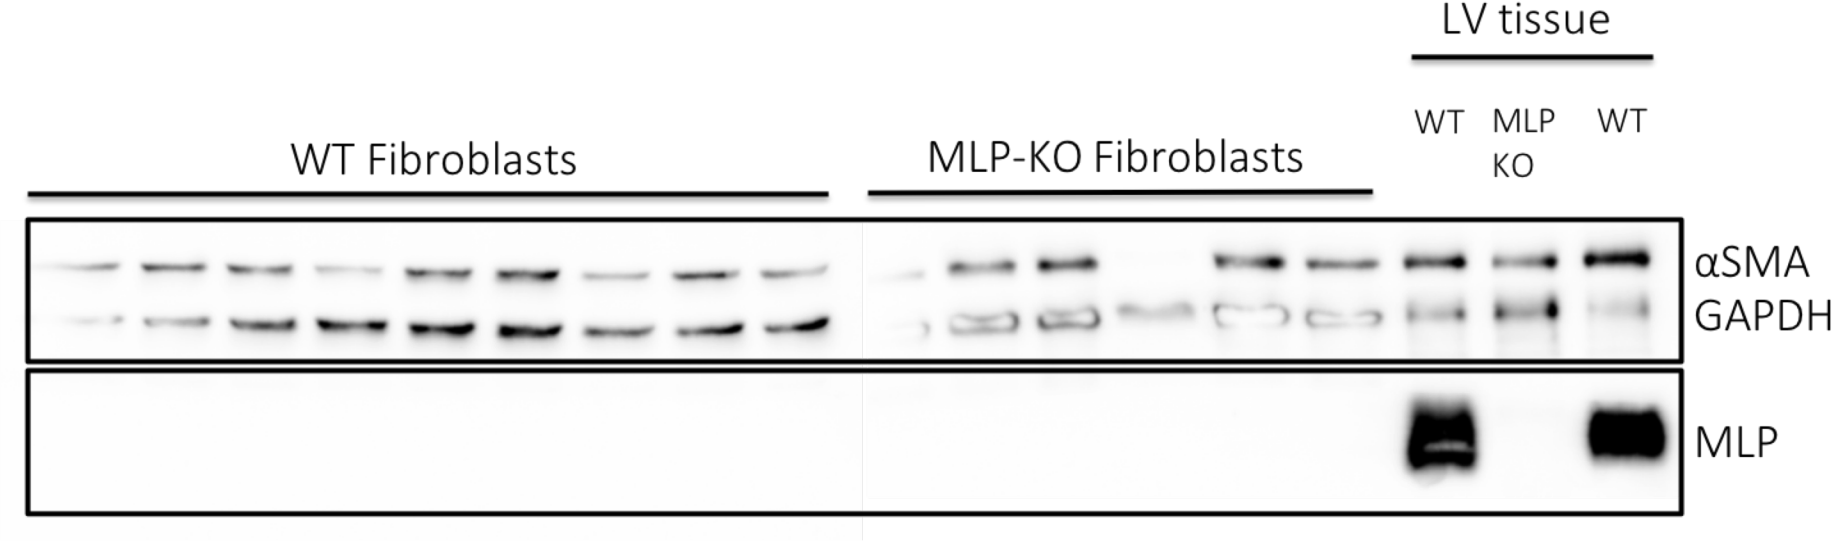



Supplemental Figure S4

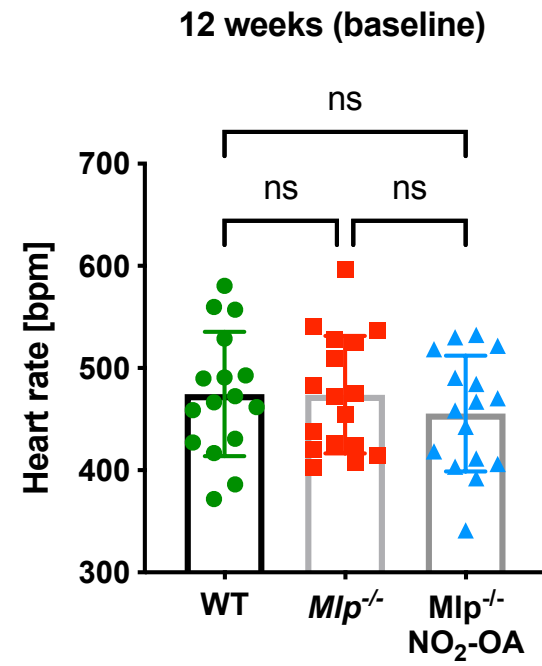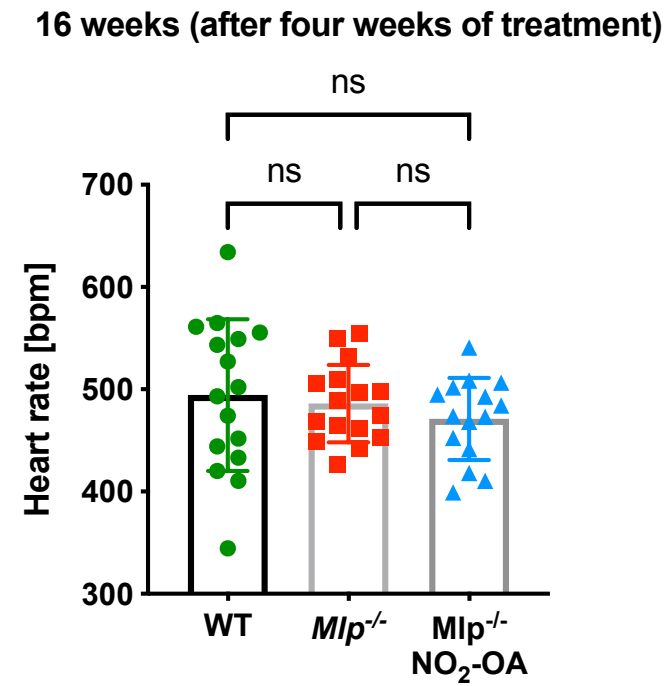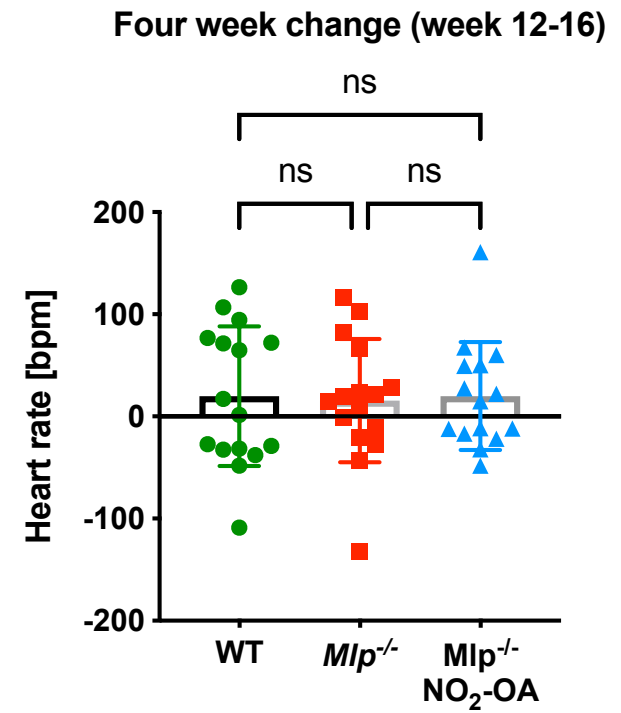

Supplemental Figure S5

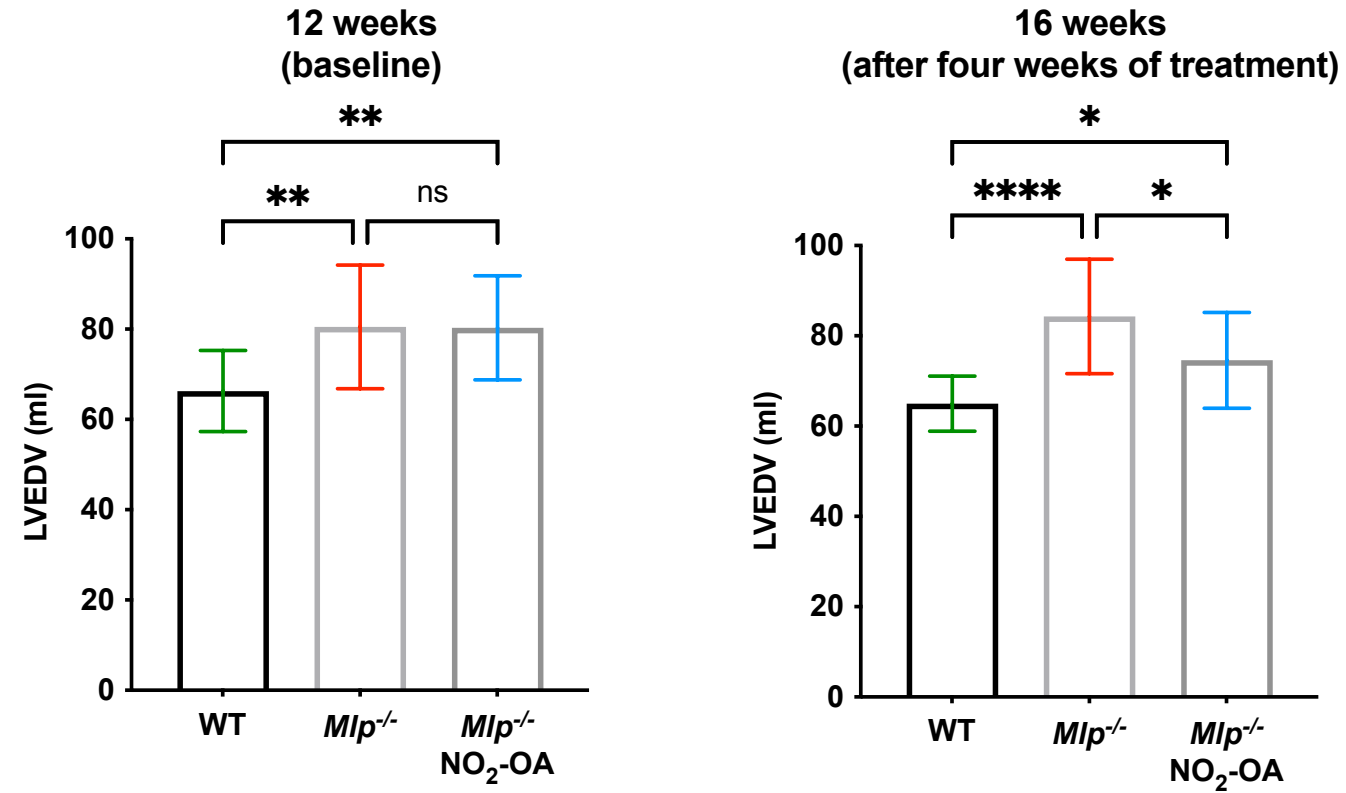

## Uncropped Western Blot – as used in Figure 3

C= unstimulated control

T= stimulated with TGFb 10ng/ml

TN= TGFb + NO<sub>2</sub>OA

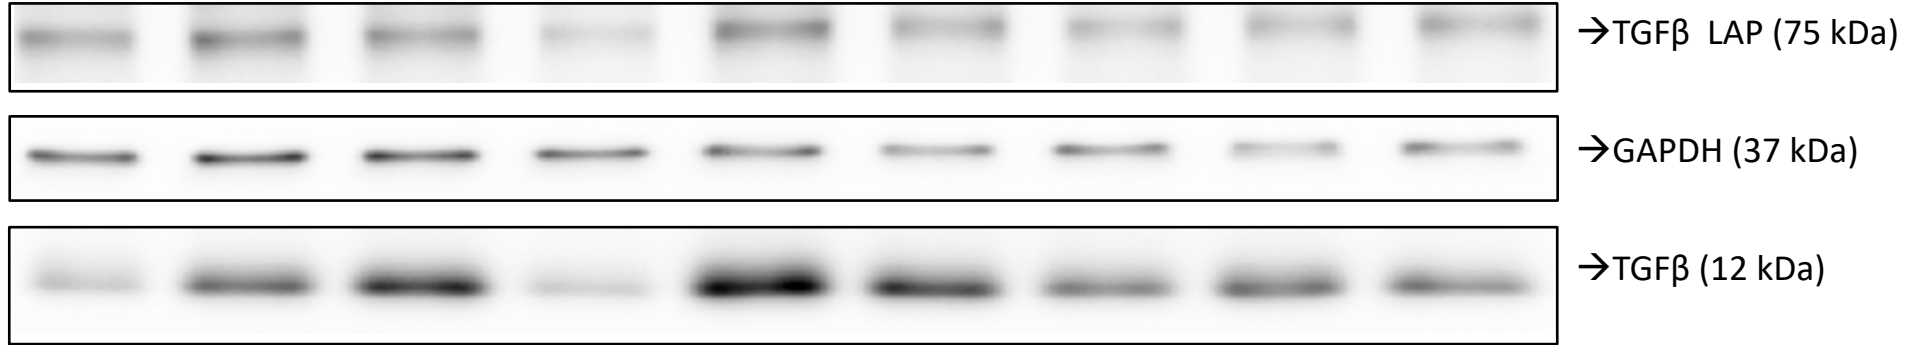

### **Conditions:**

12,5 µg sample / pocket on 12% Gel

**Blot** on NC at 200 mA for 2 h

**Block** 1h in 5% BSA

### **1st AB:**

aSMA 1:5000 at 4°C o/n

### **2nd AB:** anti-Rb

In 5% BSA at RT for 2h

**Detection:** ECL/Femto 4 to 1

Detection time aSMA 10 s

Uncropped Western Blot – Focus on aSMA (as used in Figure 4A)

C= unstimulated control  
T= stimulated with TGFb 10ng/ml  
TN= TGFb + NO<sub>2</sub>OA

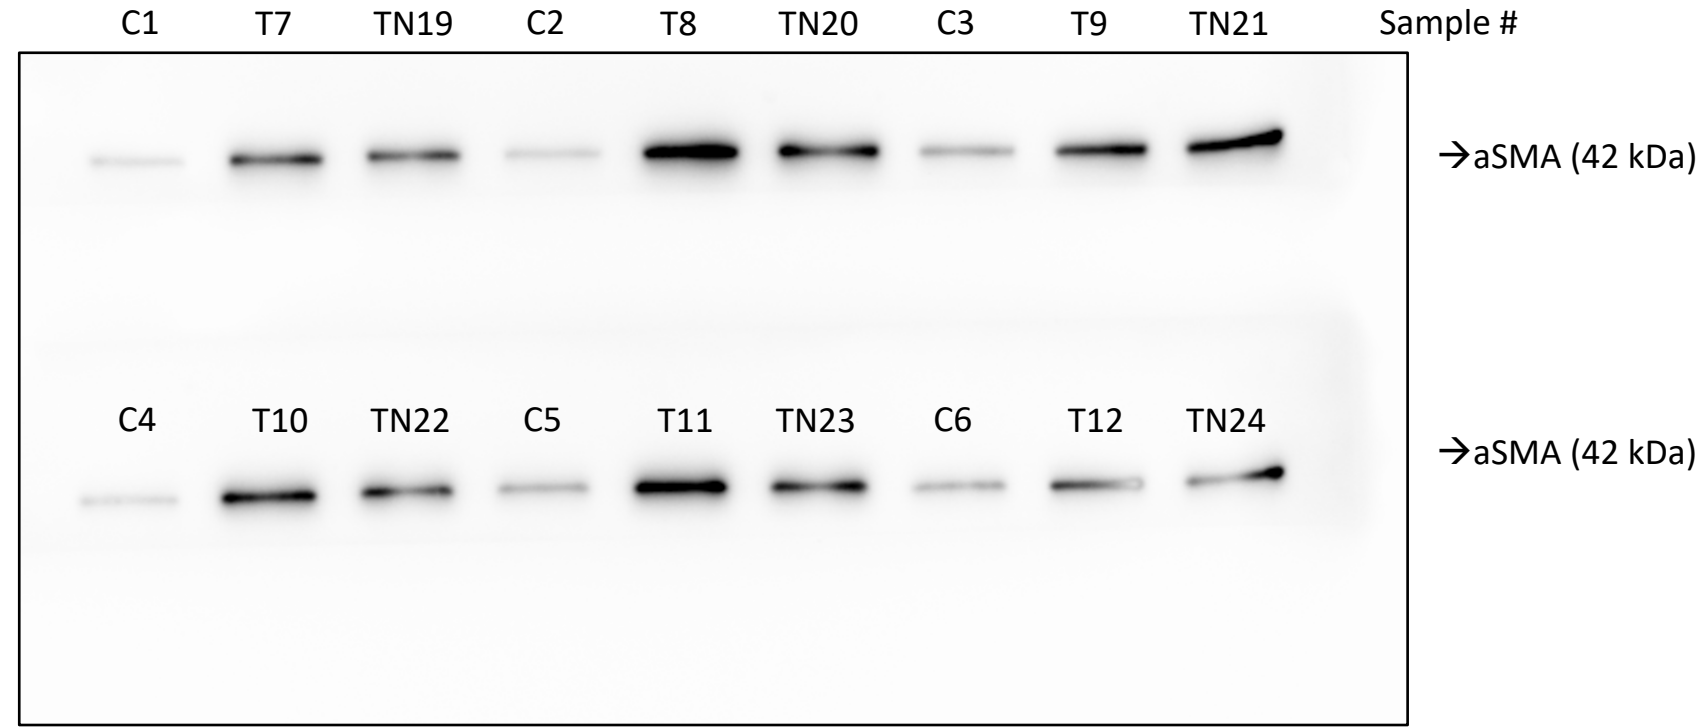

**Conditions:**  
12,5 µg sample / pocket on 12% Gel  
**Blot** on NC at 200 mA for 2 h  
**Block** 1h in 5% BSA

**1st AB:**  
aSMA 1:5000 at 4°C o/n

**2nd AB:** anti-Rb  
In 5% BSA at RT for 2h

**Detection:** ECL/Femto 4 to 1  
Detection time aSMA 10 s

Uncropped Western Blot – Focus on GAPDH (as used in Figure 4A)

C= unstimulated control  
T= stimulated with TGFb 10ng/ml  
TN= TGFb + NO<sub>2</sub>OA

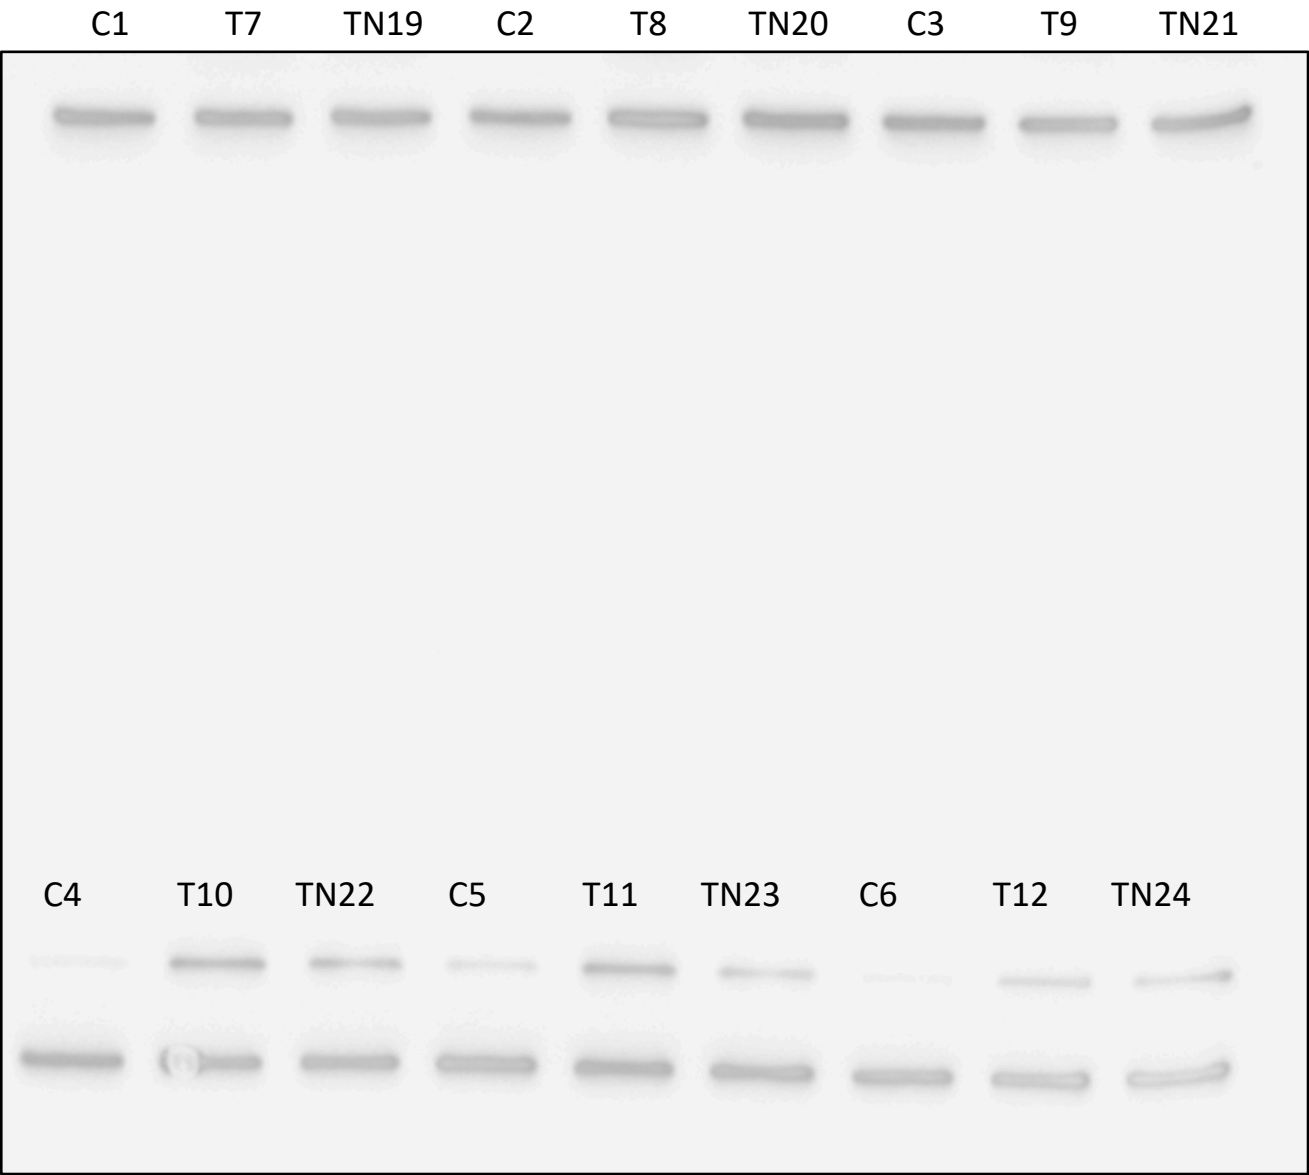

Sample #

→GAPDH (37 kDa)

→aSMA (42 kDa) see previous slide

→GAPDH (37 kDa)

**Conditions:**  
12,5 µg sample / pocket on 12% Gel  
**Blot** on NC at 200 mA for 2 h  
**Block** 1h in 5% BSA  
  
**1st AB:**  
GAPDH 1:7500 at 4°C o/n  
  
**2nd AB:** anti-Rb  
In 5% BSA at RT for 2h  
  
**Detection:** ECL/Femto 4 to 1  
Detection time GAPDH <1 s

# Uncropped Western Blot – Focus on pSmad 2 pSer 465/467 (as used in Figure 4C)

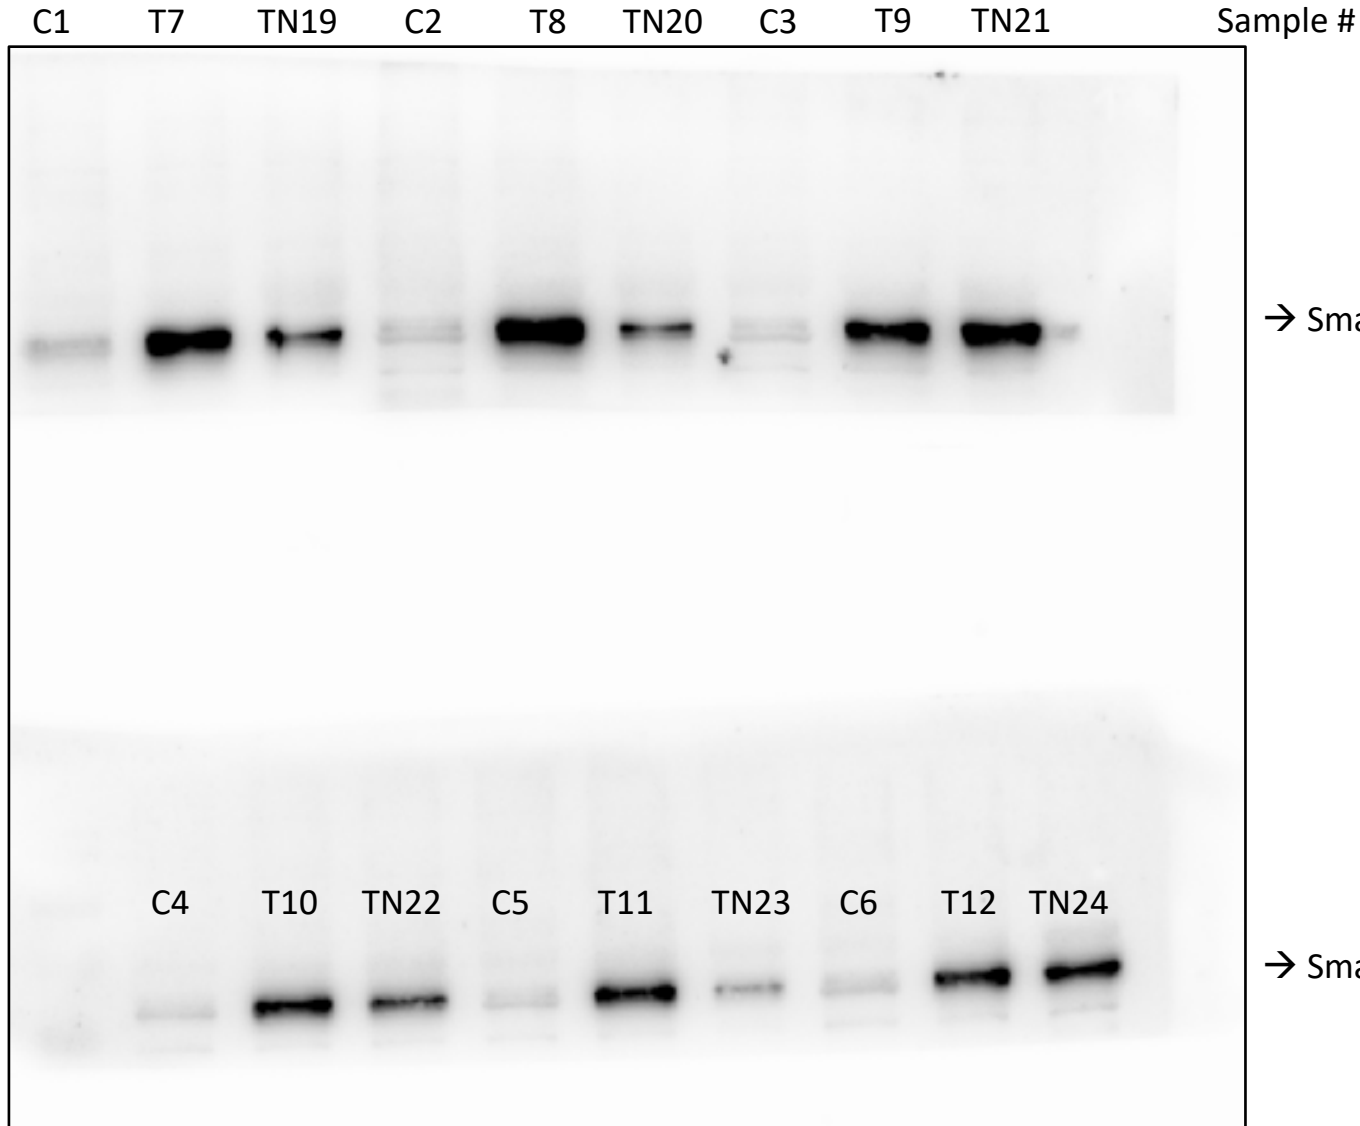

C= unstimulated control

T= stimulated with TGFb 10ng/ml

TN= TGFb + NO<sub>2</sub>OA

→ Smad 2 pSer465/467 (~ 58 kDa)

## Conditions:

12,5 µg sample / pocket on 12% Gel

**Blot** on NC at 200 mA for 2 h

**Block** 1h in 5% BSA

## **1st AB:**

Smad 2 pSer465/467 1:1000 at 4°C o/n

## **2nd AB:** anti-Rb

In 5% BSA at RT for 2h

**Detection:** ECL/Femto 4 to 1

Detection time Smad 2 pSer465/467 30 s

→ Smad 2 pSer465/467 (~ 58 kDa)

C= unstimulated control  
T= stimulated with TGFb 10ng/ml  
TN= TGFb + NO<sub>2</sub>OA

# Uncropped Western Blot – Focus on Total Smad 2/3 (as used in Figure 4C)

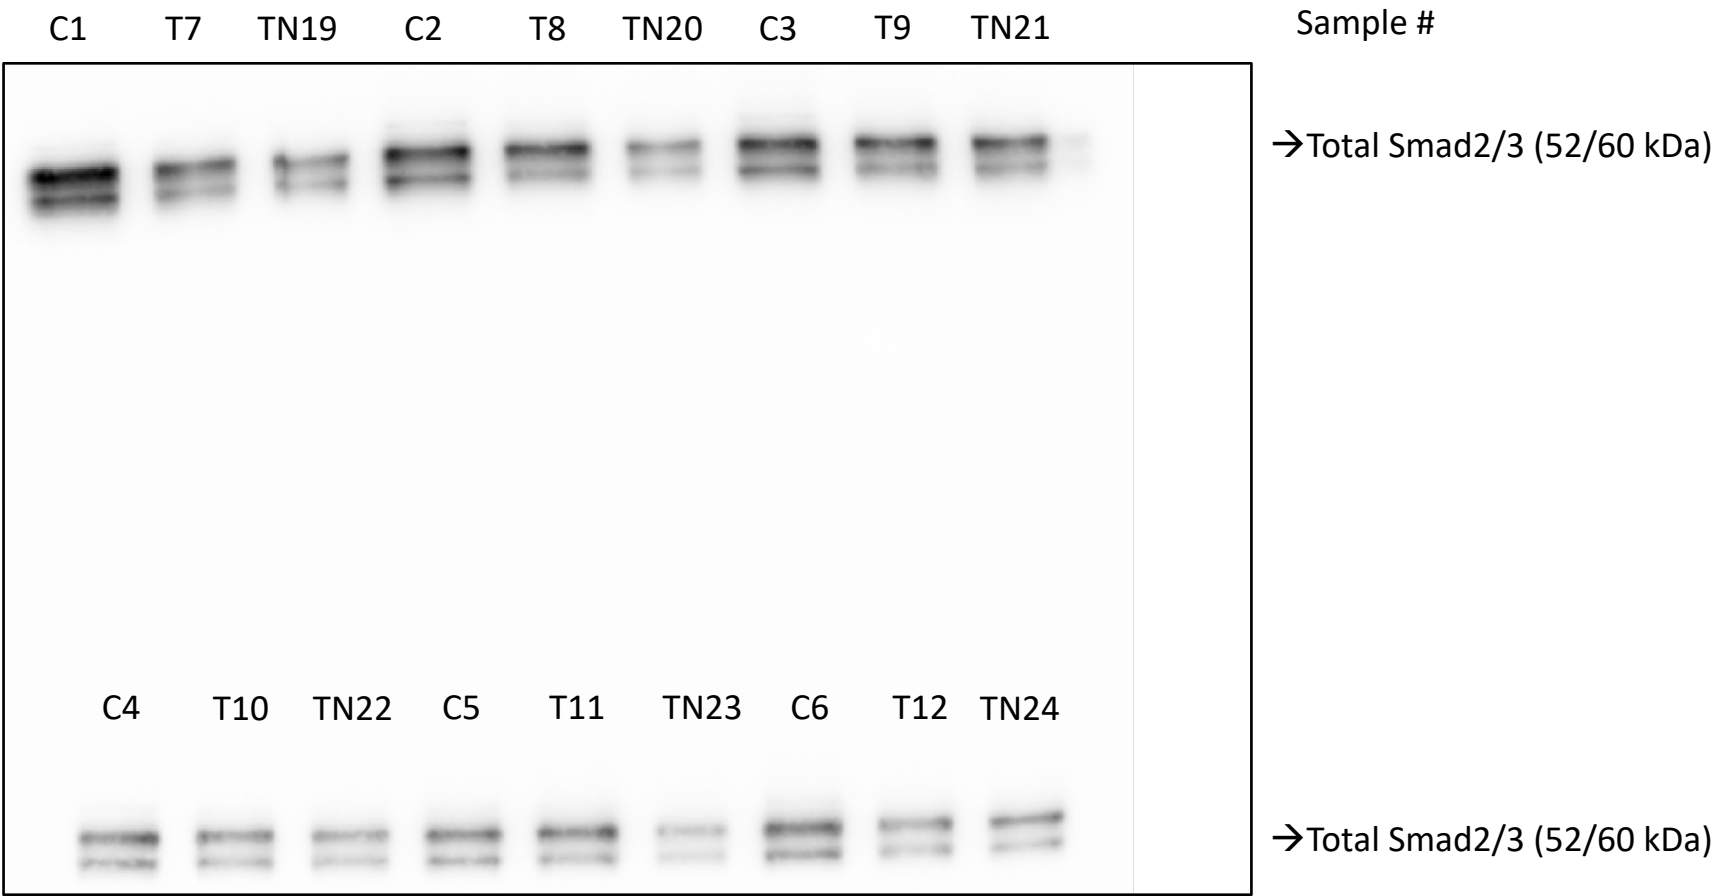

**Conditions:**  
12,5 µg sample / pocket on 12% Gel  
**Blot** on NC at 200 mA for 2 h  
**Block** 1h in 5% BSA

**1st AB:**  
After stripping with 5M NaOH for 5 min  
Total Smad 2/3 1:1000 at 4°C o/n

**2nd AB:** anti-Rb  
In 5% BSA at RT for 2h

**Detection:** ECL/Femto 2 to 1  
Detection time Smad 2/3 60s

## Uncropped Western Blot – Focus on GAPDH (as used in Figure 4C)

C= unstimulated control

T= stimulated with TGFb 10ng/ml

TN= TGFb + NO<sub>2</sub>OA

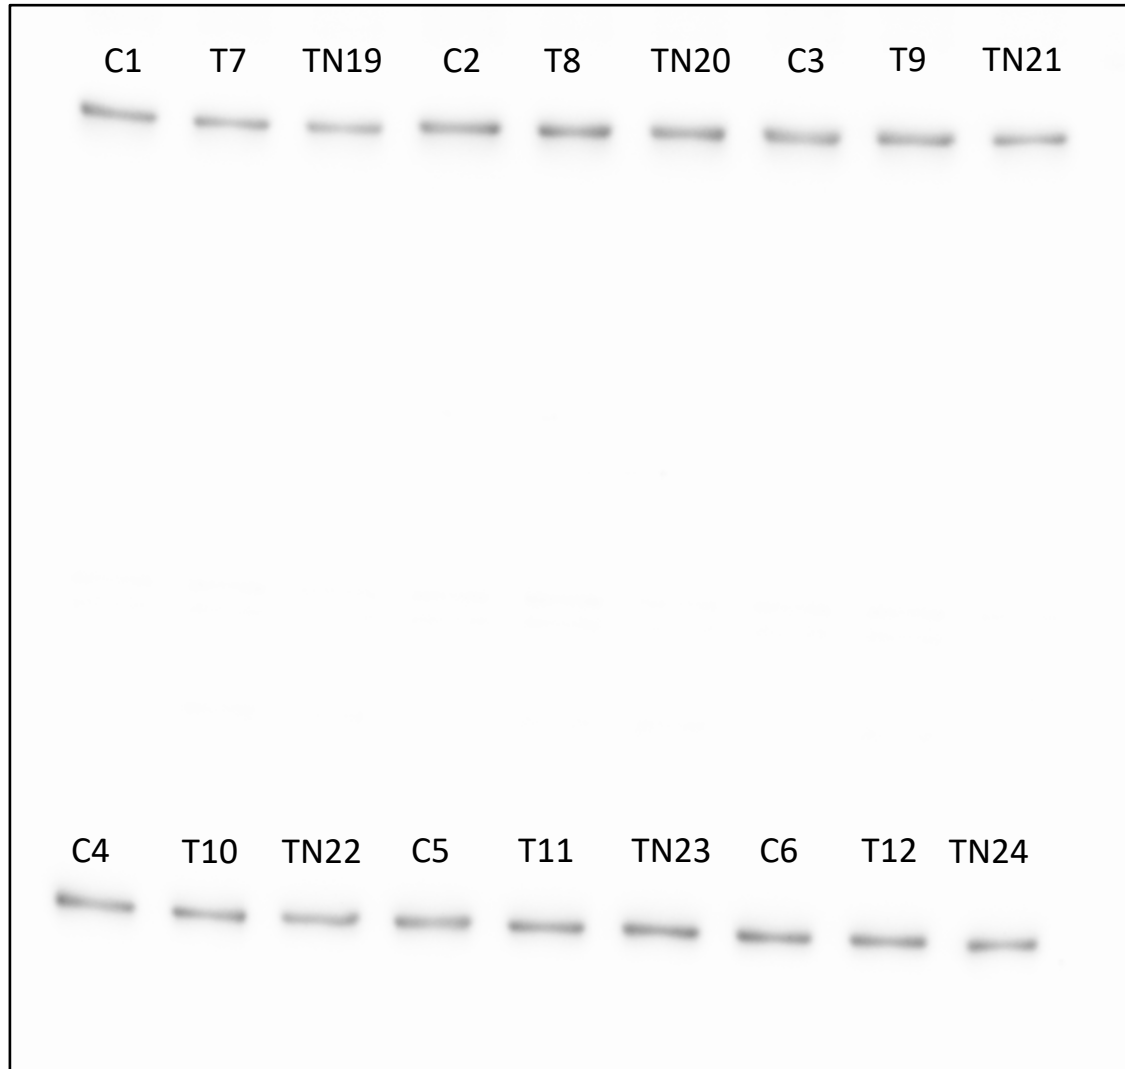

Sample #

→GAPDH (37 kDa)

→GAPDH (37 kDa)

### Conditions:

12,5 µg sample / pocket on 12% Gel

**Blot** on NC at 200 mA for 2 h

**Block** 1h in 5% BSA

### **1st AB:**

GAPDH 1:7500 at 4°C o/n

### **2nd AB:** anti-Rb

In 5% BSA at RT for 2h

**Detection:** ECL/Femto 4 to 1

Detection time GAPDH 1,5 s



## Uncropped Western Blot – Focus on STAT3 (as used in Figure 4D)

C= unstimulated control

T= stimulated with TGFb 10ng/ml

TN= TGFb + NO<sub>2</sub>OA

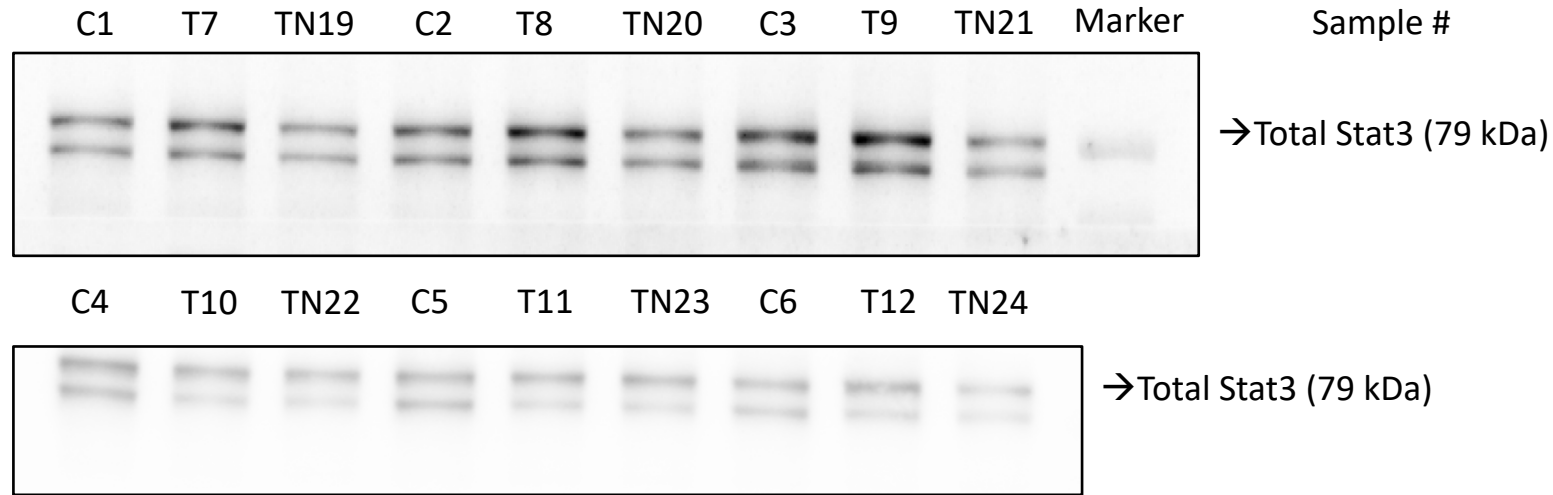

### **Conditions:**

12,5 µg sample / pocket on 12% Gel

**Blot** on NC at 200 mA for 2 h

**Block** 1h in 5% BSA

### **1st AB:**

After stripping with 5M NaOH for 5 min

Total Stat3 1:1000 at 4°C o/n

### **2nd AB:** anti-Rb

In 5% BSA at RT for 2h

### **Detection:** ECL/Femto 2 to 1

Detection time total Stat 3 60 s

## Uncropped Western Blot – Focus on STAT3 (as used in Figure 4D)

C= unstimulated control

T= stimulated with TGFb 10ng/ml

TN= TGFb + NO<sub>2</sub>OA

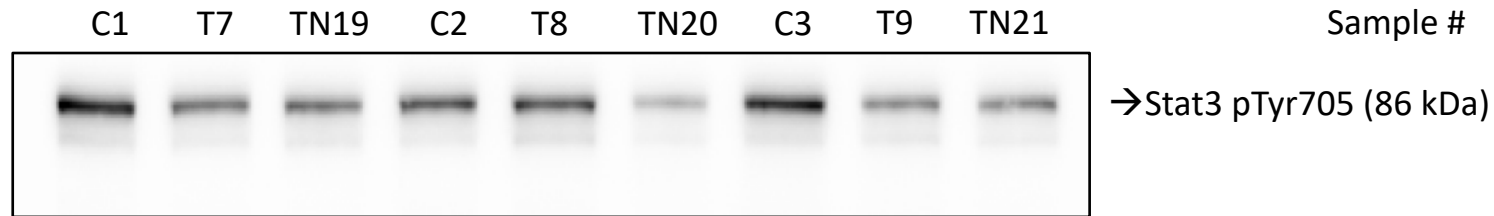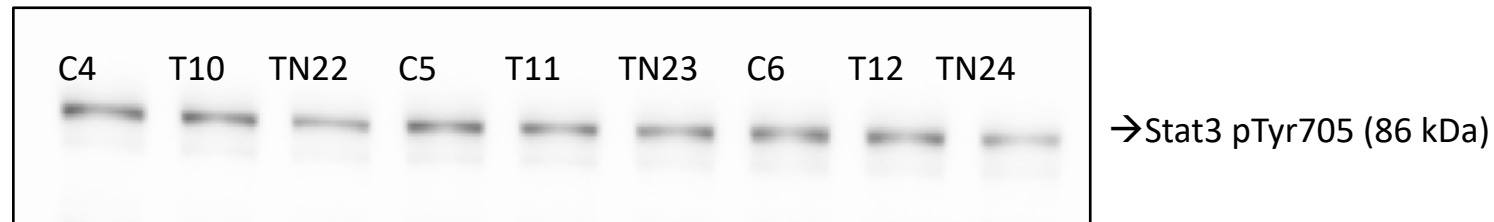

### Conditions:

12,5 µg sample / pocket on 12% Gel

**Blot** on NC at 200 mA for 2 h

**Block** 1h in 5% BSA

### **1st AB:**

Stat3 pTyr705 1:1000 at 4°C o/n

### **2nd AB:** anti-

In 5% BSA at RT for 2h

**Detection:** ECL/Femto 1 to 1

Detection time Stat3 pTyr705 30 s

# Uncropped Western Blot – Focus on Erk 1/2 pThr202/Tyr204 (as used in Figure 4E)

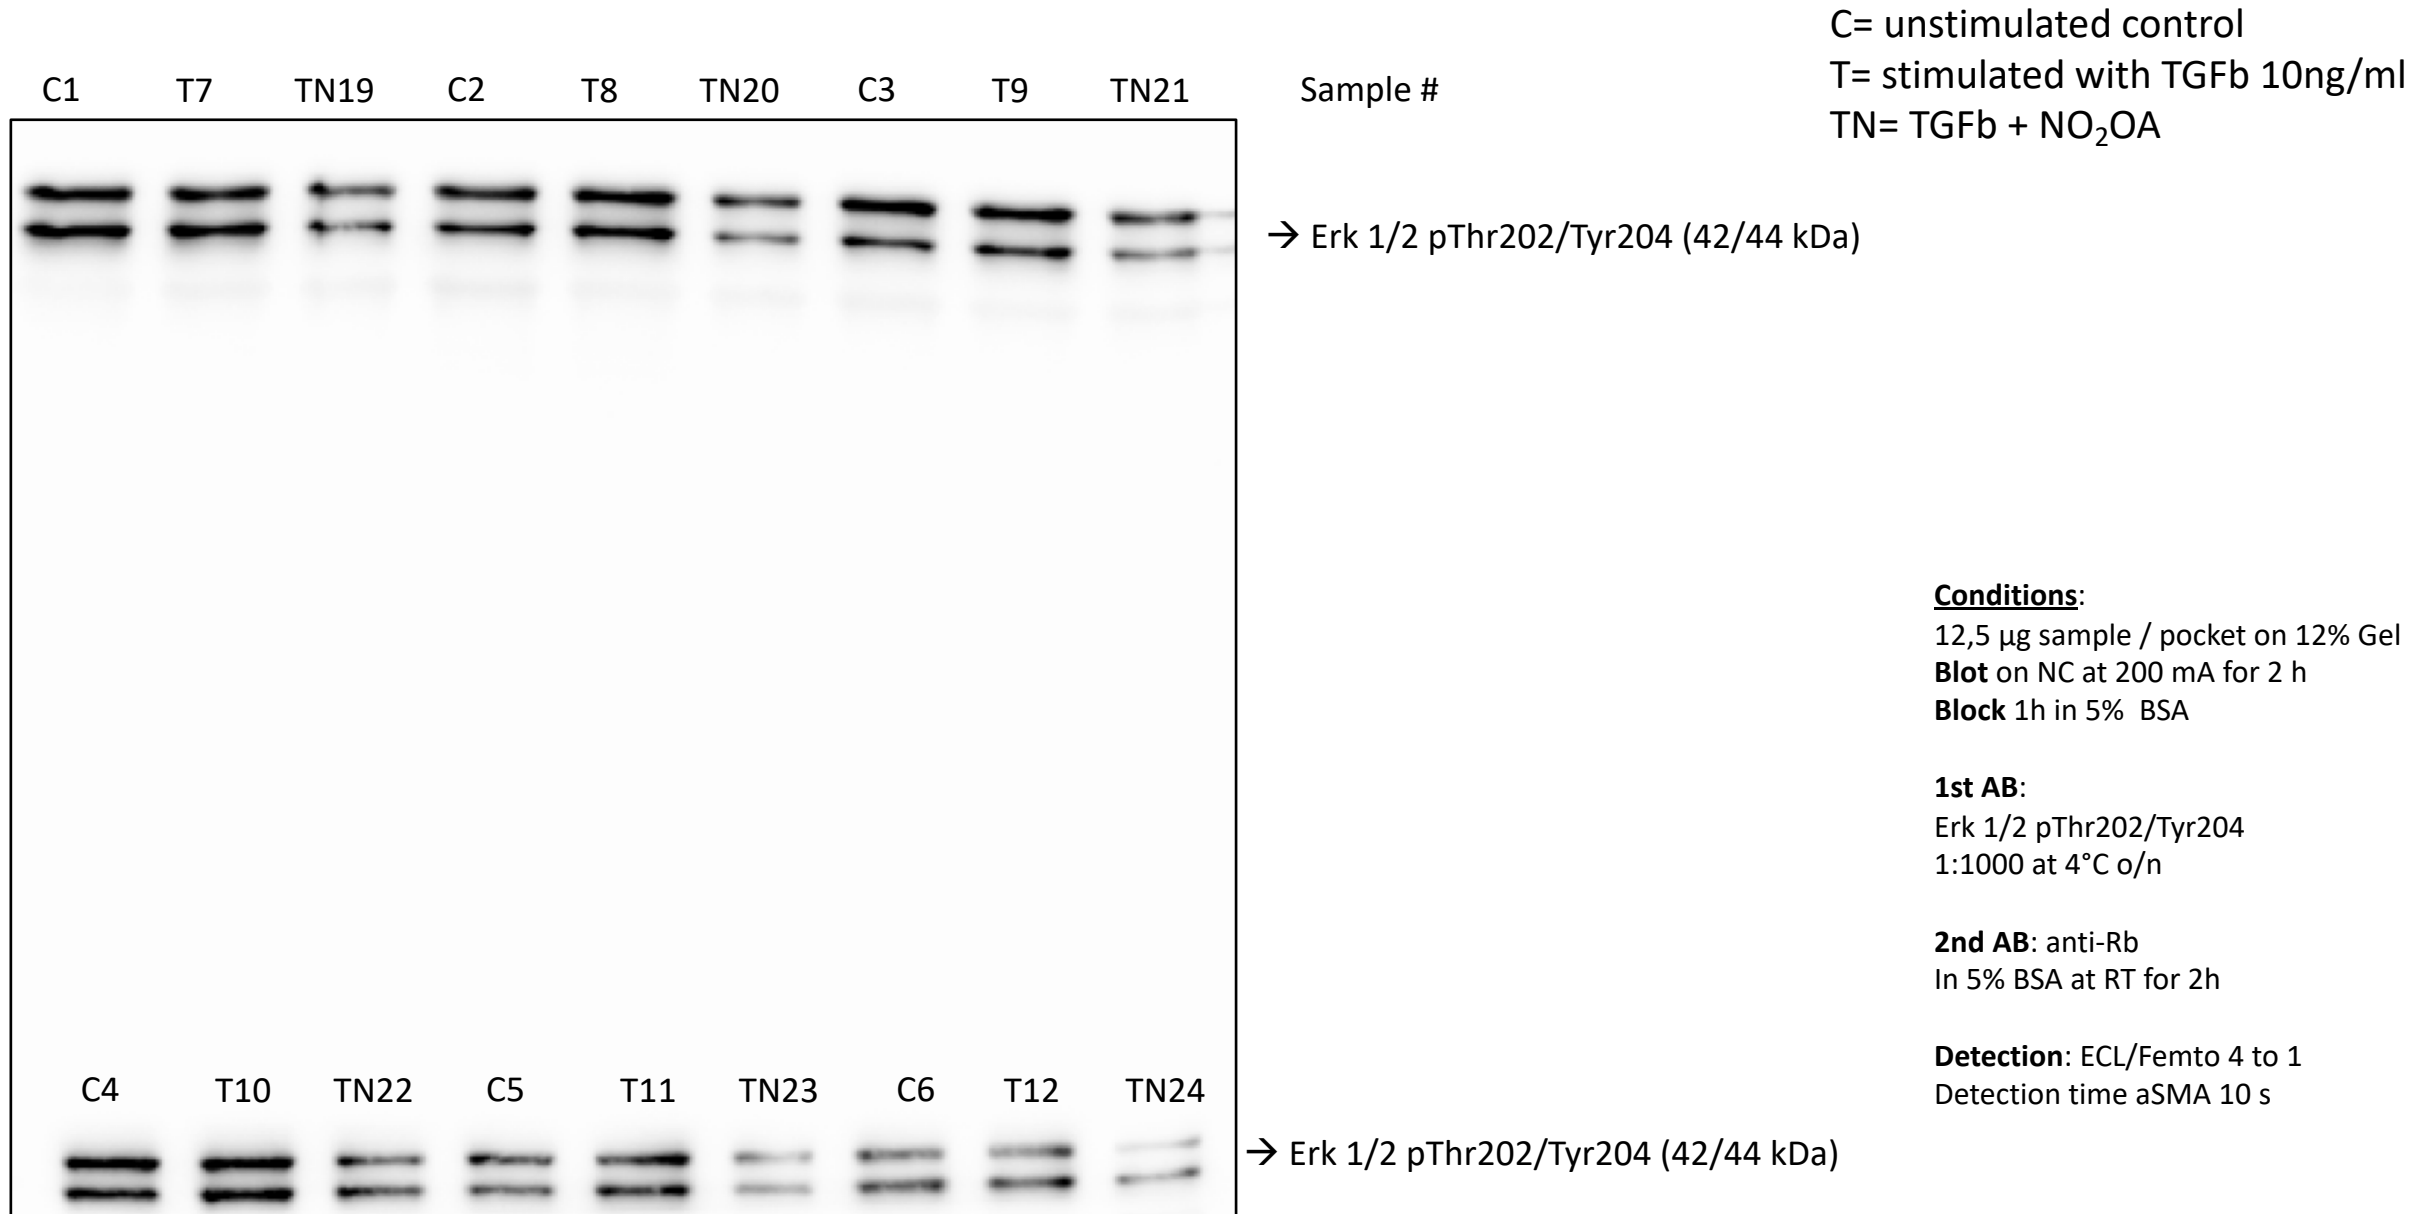

## Uncropped Western Blot – Focus on Total Erk 1/2 (as used in Figure 4E)

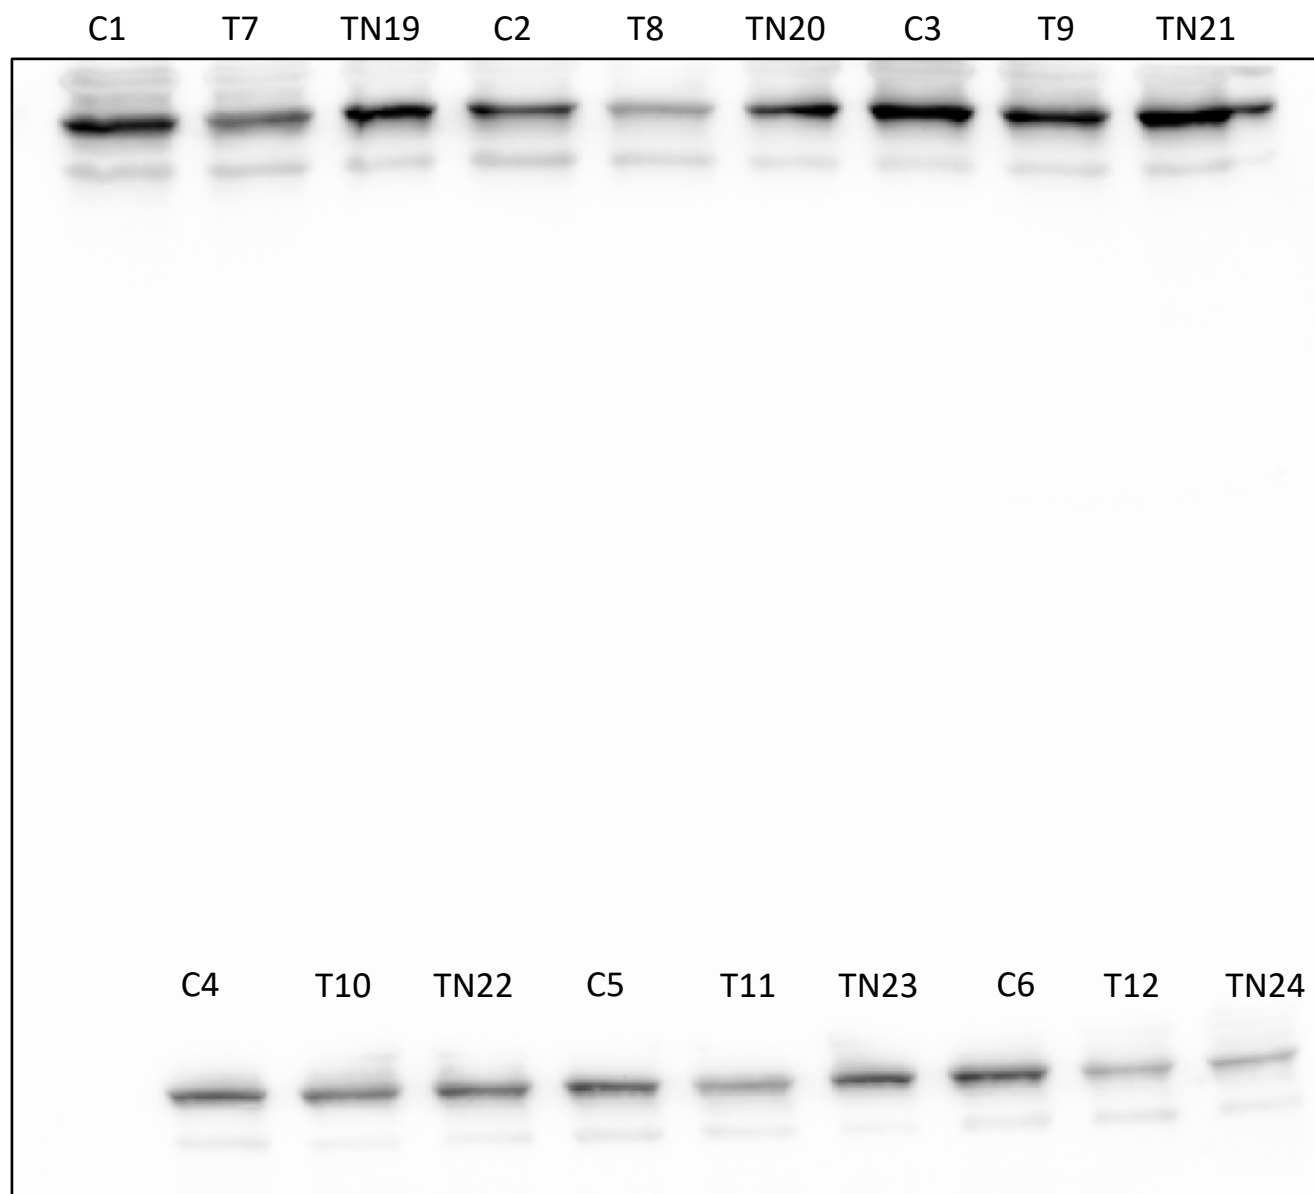

Sample #

→ Total Erk 1/2 (42/44 kDa)

C= unstimulated control

T= stimulated with TGFb 10ng/ml

TN= TGFb + NO<sub>2</sub>OA

### Conditions:

12,5 µg sample / pocket on 12% Gel

**Blot** on NC at 200 mA for 2 h

**Block** 1h in 5% BSA

### **1st AB:**

Total Erk 1/2

1:1000 at 4°C o/n

### **2nd AB:** anti-Rb

In 5% BSA at RT for 2h

**Detection:** ECL/Femto 4 to 1

Detection time aSMA 10 s

→ Total Erk 1/2 (42/44 kDa)

| Gene           | Forward Primer       | Reverse Primer       |
|----------------|----------------------|----------------------|
| Actin $\beta$  | GCTGTATTCCCCTCCATCG  | GGGGTGTTGAAGGTCTCAAA |
| TGF $\beta$    | AGCCCGAAGCGGACTACTAT | ACGCCAGGAATTGTTGCTAT |
| TGF $\beta$ R1 | TGGTCCAGTCTGCTTCGTCT | GTGGTGCCCTCTGAAATGAA |

**Supplementary Table S1:** Primers used for qPCR
